# Supplementary material for: Structure-Based Development of SARS-CoV-2 Spike Interactors
Source: MDPI journal article supplement (doi:10.3390/ijms23105601), 2022-05-17
Supplement: s1 [file s1]

## Supplementary Material

### Supplementary Tables

**Table S1.** MD structural model details

| MD1 |                            | Residues           | # Res Atoms |
|-----|----------------------------|--------------------|-------------|
|     | <b>S-plug</b> (ACE2-like)  | 19-103 (85 res.)   | 4174        |
|     | Spike RBD domain           | 336-516 (181 res.) | 60324       |
|     | Water molecules            | 20108              | 2           |
|     | Ions (Na <sup>+</sup> )    | 2                  | 2           |
| MD2 |                            |                    |             |
|     | <b>S-plug2</b> (ACE2-like) | 19-103 (85 res.)   | 4212        |
|     | Spike RBD domain           | 336-516 (181 res.) | 61968       |
|     | Water molecules            | 20656              | 2           |
|     | Ions (Cl <sup>-</sup> )    | 2                  | 2           |

**Table S2.** Spike–ACE2 binding affinities measured by different studies

| Protein coated/analyte | K <sub>D</sub><br>(nM) | Coating<br>method                               | Detection<br>method | References |
|------------------------|------------------------|-------------------------------------------------|---------------------|------------|
| SARS-CoV-2 Spike/ACE2  | 14.7                   | Non-covalently<br>immobilised to<br>sensor chip | SPR                 | [1]        |
| SARS-CoV-2 Spike/ACE2  | 1.2                    | Non-covalently<br>immobilised to<br>sensor chip | Blitz               | [2]        |
| ACE2/SARS-CoV-2 RBD    | 4.7                    | Covalently<br>immobilised to<br>sensor chip     | SPR                 | [3]        |
| SARS-CoV-2 RBD/ACE2    | 44.2                   | Covalently<br>immobilised to<br>sensor chip     | SPR                 | [4]        |

## Supplementary Figures

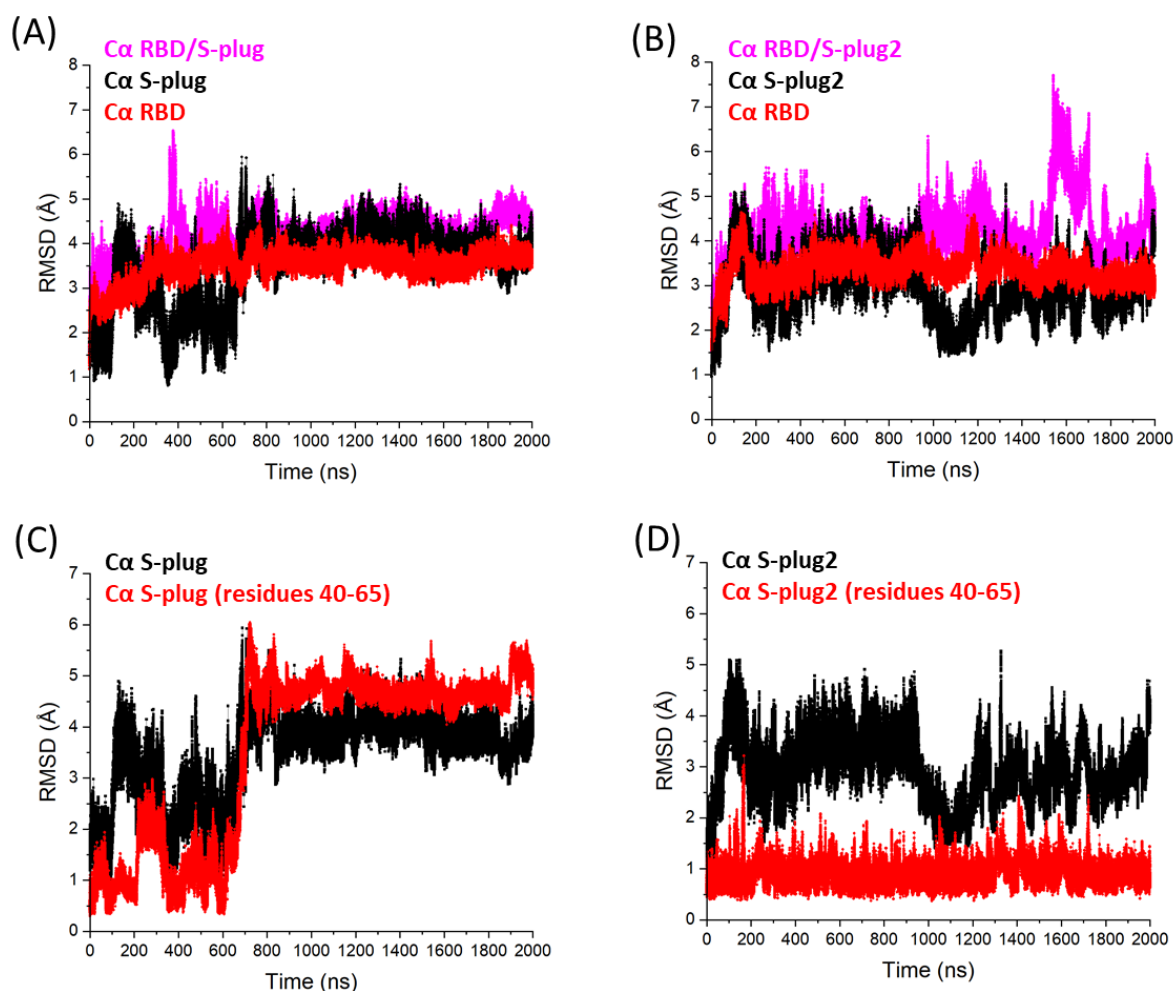

**Figure S1.** RMSD time evolution. (A)  $C^\alpha$  RMSD values (MD simulation of S-plug/RBD) are reported in black, red and magenta for S-plug, RBD and the entire complex, respectively; (B)  $C^\alpha$  RMSD values of (MD simulation of S-plug2/RBD) are reported in black, red and magenta for S-plug2, RBD and the entire complex, respectively; (C)  $C^\alpha$  RMSD values computed for S-plug (black) and the region 40-65  $C^\alpha$  in the S-plug/RBD simulation; (D)  $C^\alpha$  RMSD values computed for S-plug2 (black) and the region 40-65  $C^\alpha$  in the S-plug2/RBD simulation.

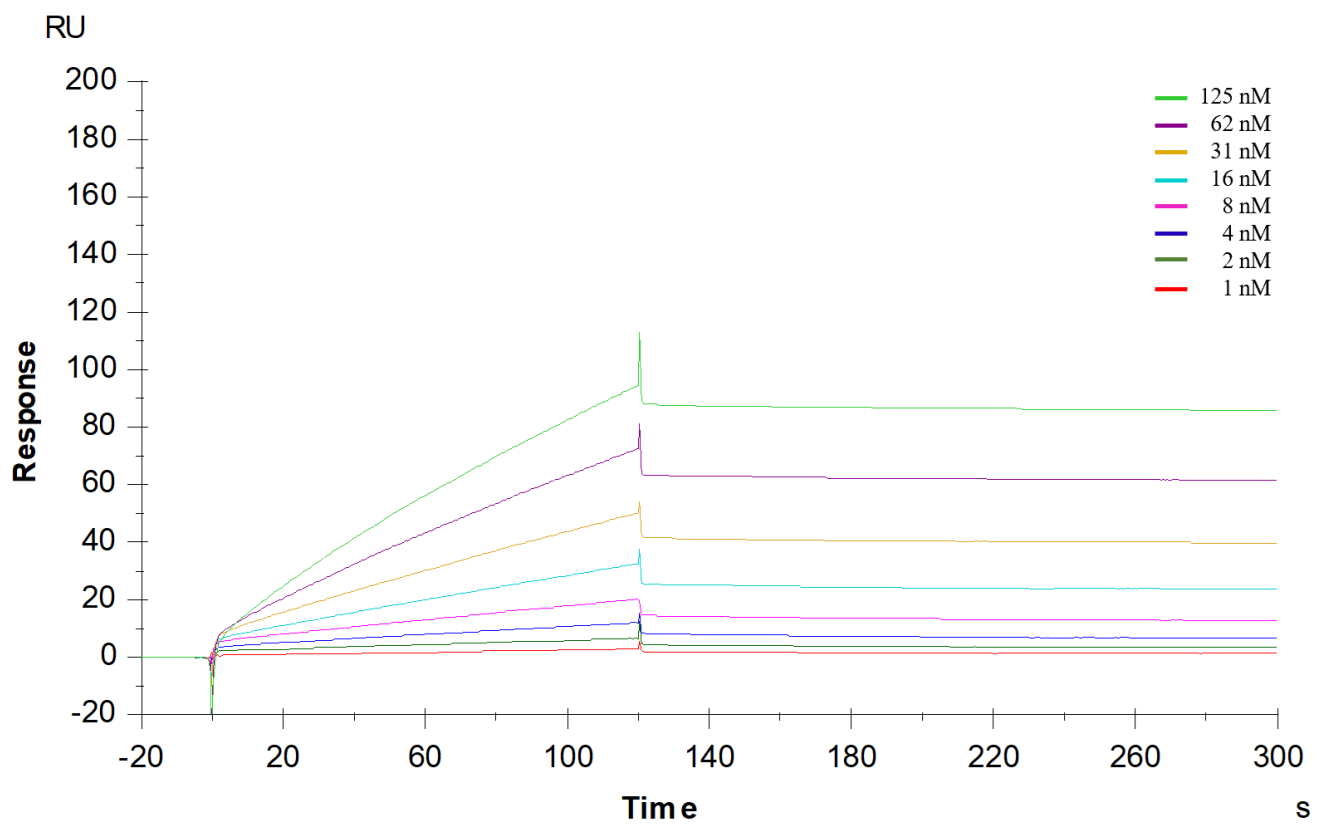

**Figure S2.** Surface Plasmon Resonance (SPR) analysis. Sensorgrams to evaluate the binding affinity of the host ACE2 domain to SARS-CoV-2 Spike S1 domain.

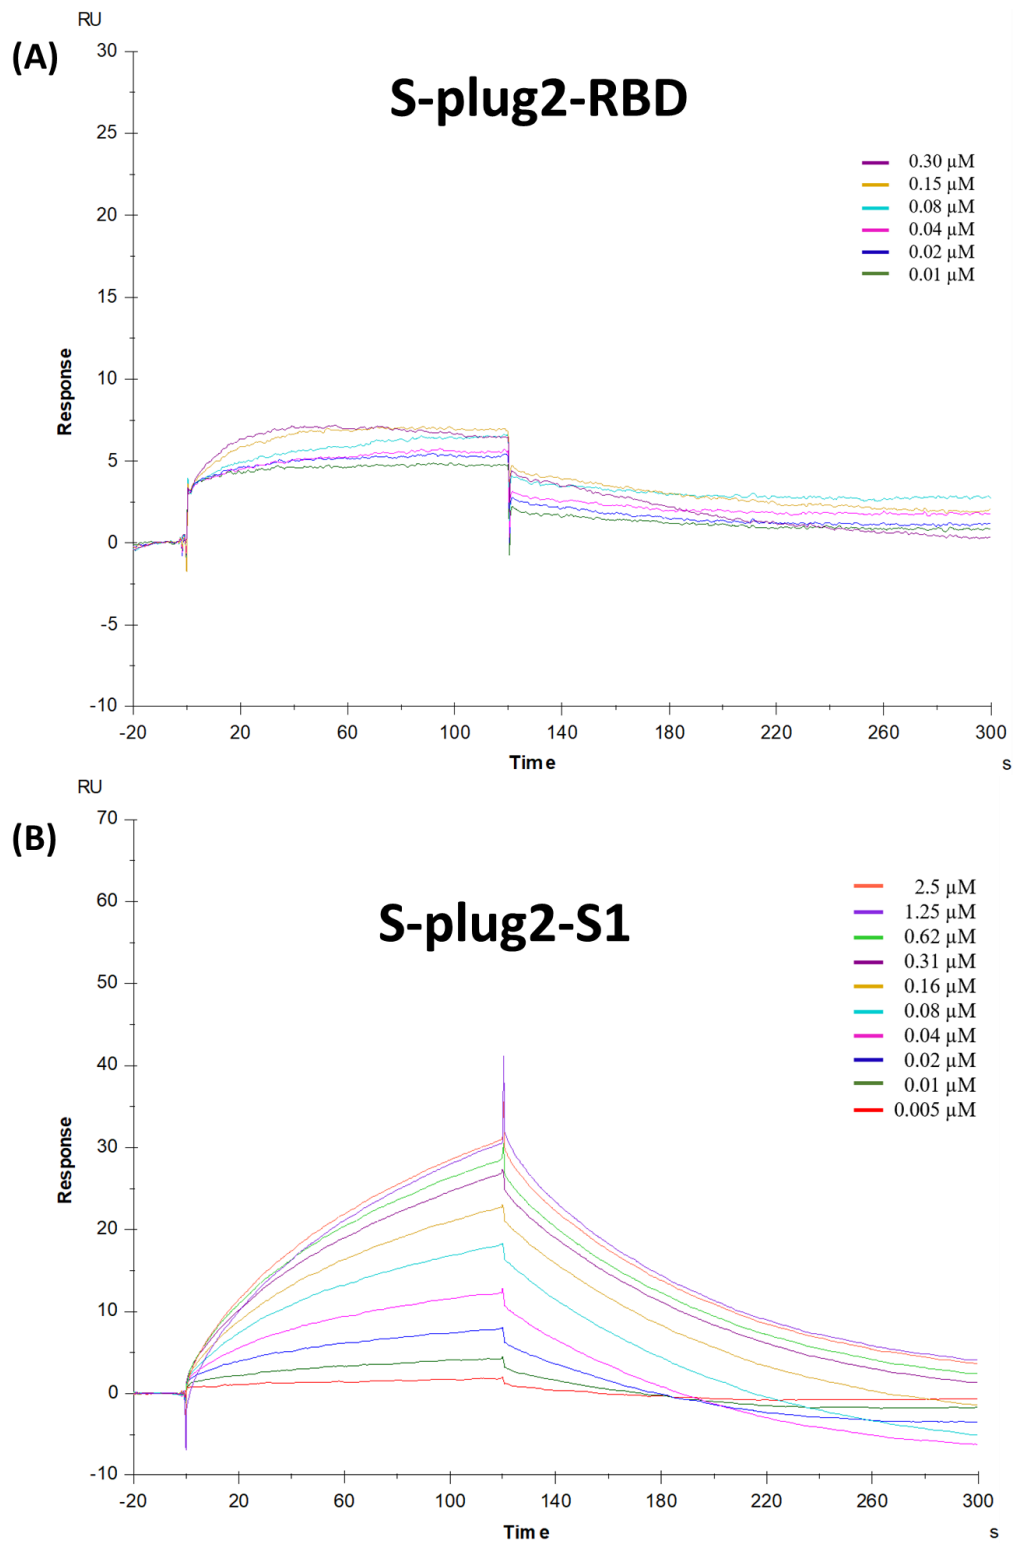

**Figure S3.** Surface Plasmon Resonance (SPR) analysis. Sensorgrams to evaluate the binding affinity of S-plug2 to (A) Spike RDB domain and (B) Spike S1 domain.

## Supplementary References

1. Wrapp, D.; Wang, N.; Corbett, K.S.; Goldsmith, J.A.; Hsieh, C.L.; Abiona, O.; Graham, B.S.; McLellan, J.S. Cryo-EM structure of the 2019-nCoV spike in the prefusion conformation. *Science* **2020**, *367*, 1260-1263, doi:10.1126/science.abb2507.
2. Walls, A.C.; Park, Y.J.; Tortorici, M.A.; Wall, A.; McGuire, A.T.; Veesler, D. Structure, Function, and Antigenicity of the SARS-CoV-2 Spike Glycoprotein. *Cell* **2020**, *181*, 281-292 e286, doi:10.1016/j.cell.2020.02.058.
3. Lan, J.; Ge, J.; Yu, J.; Shan, S.; Zhou, H.; Fan, S.; Zhang, Q.; Shi, X.; Wang, Q.; Zhang, L., et al. Structure of the SARS-CoV-2 spike receptor-binding domain bound to the ACE2 receptor. *Nature* **2020**, 10.1038/s41586-020-2180-5, doi:10.1038/s41586-020-2180-5.
4. Shang, J.; Ye, G.; Shi, K.; Wan, Y.; Luo, C.; Aihara, H.; Geng, Q.; Auerbach, A.; Li, F. Structural basis of receptor recognition by SARS-CoV-2. *Nature* **2020**, *581*, 221-224, doi:10.1038/s41586-020-2179-y.
